# Supplementary material for: Distinct expression profiles and functions of Kindlins in breast cancer
Source: PubMed Central journal article supplement (PMC6260766; doi:10.1186/s13046-018-0955-4), 2018-11-26
Supplement: 13046_2018_955_MOESM1_ESM.pdf [file 13046_2018_955_MOESM1_ESM.pdf]

**Supplementary Table 1. Clinical characteristics of the TMA population (n=129)**

| <b>Age at diagnosis</b>       |                          |
|-------------------------------|--------------------------|
|                               | 55.3 years (22-83 years) |
| <b>SBR histological grade</b> |                          |
| I                             | 11                       |
| II                            | 27                       |
| III                           | 77                       |
| <b>Lymph node status</b>      |                          |
| 0                             | 85                       |
| 1-3                           | 17                       |
| >3                            | 13                       |
| <b>Macroscopic tumor size</b> |                          |
| ≤25 mm                        | 95                       |
| >25 mm                        | 20                       |
| <b>ER status</b>              |                          |
| Negative                      | 74                       |
| Positive                      | 41                       |
| <b>PR status</b>              |                          |
| Negative                      | 77                       |
| Positive                      | 38                       |
| <b>HER2 status</b>            |                          |
| Negative                      | 79                       |
| Positive                      | 36                       |
| <b>Molecular subtypes</b>     |                          |
| TNBC                          | 61                       |
| ERBB2                         | 16                       |
| Luminal A                     | 17                       |
| Luminal B                     | 21                       |

\*Information only available for 115 samples

**Supplementary Table 2. PDX clinical characteristics (n=58)**

| <b>Origin</b>                    |    |
|----------------------------------|----|
| Primary tumor                    | 51 |
| Lymph node metastasis            | 4  |
| Omentum metastasis               | 2  |
| <b>Molecular characteristics</b> |    |
| TNBC                             | 38 |
| ER                               | 13 |
| ERBB2                            | 21 |

\*Information only available for 57 PDX

**Supplementary Table 3. qRT-PCR primers**

| <b>Kindlins Human-specific primers</b> |                                   |
|----------------------------------------|-----------------------------------|
| <i>Kindlin-1 (Hs-for)</i>              | 5'-TGATCTTTGCAG CTCTAC AGTACCA-3' |
| <i>Kindlin-1 (Hs-rev)</i>              | 5'-CTTCTATTTTCATCAACCTCGGACTC-3'  |
| <i>Kindlin-2 (Hs-for)</i>              | 5'-CTGATTCCAGTTGCAGAAGGCAT-3'     |
| <i>Kindlin-2 (Hs-rev)</i>              | 5'-CCAGTGTGCATACTGTTTTTCATTGT-3'  |
| <i>Kindlin-3 (Hs-for)</i>              | 5'-AAGGCCGGGGACGCACTCT-3'         |
| <i>Kindlin-3 (Hs-rev)</i>              | 5'-TCAGCCGCACGGGGTCTGT-3'         |
| <b>Kindlins Mouse-specific primers</b> |                                   |
| <i>Kindlin-1 (Mm-for)</i>              | 5'-CAAGCTCGTGGAACAGATGAACATAG-3'  |
| <i>Kindlin-1 (Mm-rev)</i>              | 5'-CAGTGTGTTTTTCAGAAGCCAGCAG-3'   |
| <i>Kindlin-2 (Mm-for)</i>              | 5'-AAGACACGTCCATCTCCTGCTACA-3'    |
| <i>Kindlin-2 (Mm-rev)</i>              | 5'-TCCGGAGTAACTTCACATCCTCTG-3'    |
| <i>Kindlin-3 (Mm-for)</i>              | 5'-TCTGCCGCCTCCTCAGTATCA-3'       |
| <i>Kindlin-3 (Mm-rev)</i>              | 5'-TTGTCAGGTCATGCACCTCCTCT-3'     |
| <b>Other primers used</b>              |                                   |
| <i>TBP (Hs-for)</i>                    | 5'-TGCACAGGAGCCAAGAGTGAA-3'       |
| <i>TBP (Hs-rev)</i>                    | 5'-CACATCACAGCTCCCCACCA-3'        |
| <i>CD45 (Hs-for)</i>                   | 5'-GTATTTGTGGCTTAAACTCTTGGCAT-3'  |
| <i>CD45 (Hs-rev)</i>                   | 5'-TCCAGTGGGGGAAGGTGTTG-3'        |
| <i>CD86 (Hs-for)</i>                   | 5'-TCTGAACTGTCAGTGCTTGCTAACTT-3'  |
| <i>CD86 (Hs-rev)</i>                   | 5'-AGGTTCTGGGTAACCGTGTATAGATG-3'  |
| <i>CD28 (Hs-for)</i>                   | 5'-GTGGCCTTTATTATTTTCTGGGTGAG-3'  |
| <i>CD28 (Hs-rev)</i>                   | 5'-GGCGGGGAGTCATGTTTCATGT-3'      |
| <i>CD4 (Hs-for)</i>                    | 5'-AGGCGGTGTGGGTGCTGAA-3'         |
| <i>CD4 (Hs-rev)</i>                    | 5'-GACCATGTGGGCAGAACCTTGA-3'      |
